# Supplementary material for: Inhibition of the m6A Methyltransferase METTL3 Attenuates the Inflammatory Response in Fusarium solani-Induced Keratitis via the NF-κB Signaling Pathway
Source: PubMed Central journal article supplement — Invest Ophthalmol Vis Sci. 2022 Oct 4;63(11):2. doi: 10.1167/iovs.63.11.2 (PMC9547362; doi:10.1167/iovs.63.11.2), 2022-10-04
Supplement: iovs-63-11-2_s001.pdf [file iovs-63-11-2_s001.pdf]

**A**

PAS staining of macrophages

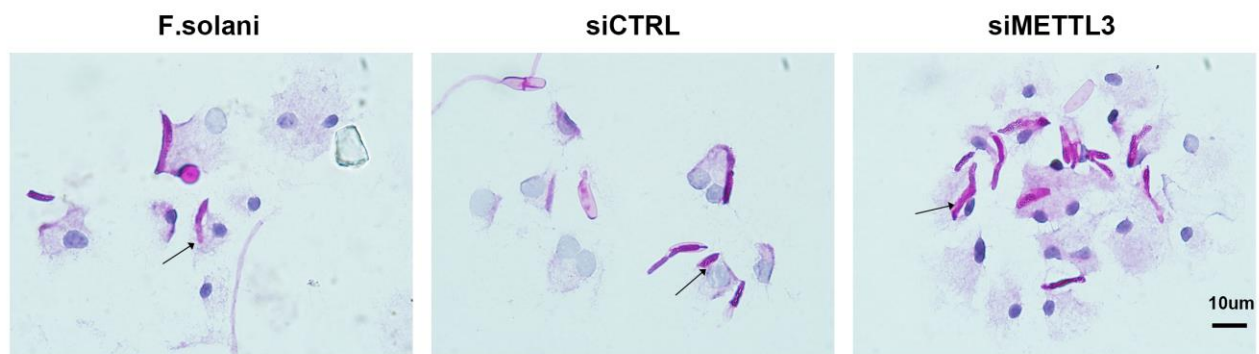**B**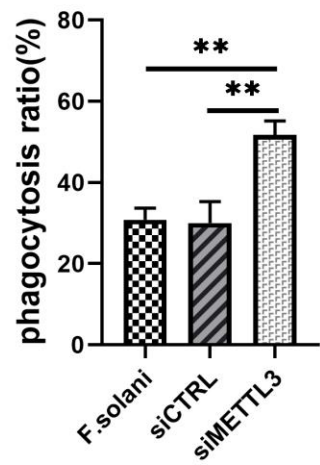**C**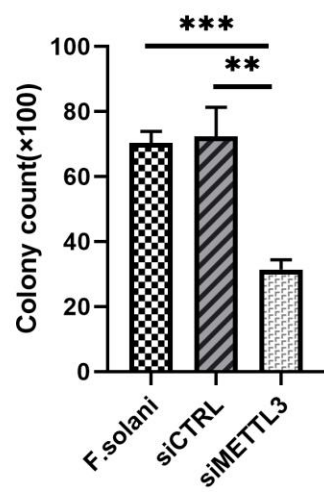**D**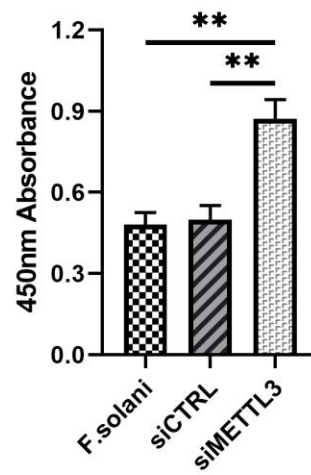

**Fig. S1 Downregulation of METTL3 promoted phagocytosis of macrophages and increased corneal stromal cell viability.** (A, B) PAS staining showing the phagocytosis of spores by macrophages between the *F. solani*, siCTRL and siMETTL3 groups. Arrows indicate spores. (C) The ability of macrophages to clear fungal spores in vitro was quantified by counting the colony forming units. (D) CCK8 assay was used to verify the viability of corneal stromal cells. n = 3; \*\*P < 0.01, \*\*\*P < 0.001. The scale bar indicates 10  $\mu$ m.
