# Supplementary material for: Inhibition of the m6A Methyltransferase METTL3 Attenuates the Inflammatory Response in Fusarium solani-Induced Keratitis via the NF-κB Signaling Pathway
Source: PubMed Central journal article supplement — Invest Ophthalmol Vis Sci. 2022 Oct 4;63(11):2. doi: 10.1167/iovs.63.11.2 (PMC9547362; doi:10.1167/iovs.63.11.2), 2022-10-04
Supplement: iovs-63-11-2_s002.pdf [file iovs-63-11-2_s002.pdf]

## Supplementary Table 1

Primers used in this study

| Gene          | Forward                | Reverse                  |
|---------------|------------------------|--------------------------|
| METTL3        | CGCTGCCTCCGATGTTGATCTG | CTGACTGACCTTCTTGCTCTGCTG |
| IL-1 $\beta$  | CTTTCCCGTGGACCTTCCA    | CTCGGAGCCTGTAGTGCAGTT    |
| IL-6          | ACCACTCCCAACAGACCTGTCT | CAGATTGTTTTCTGCAAGTGCAT  |
| TNF- $\alpha$ | ACAAGGCTGCCCGACTAC     | TGGGCTCATACCAGGGTTTG     |
| GAPDH         | GCCACCCAGAAGACTGTGGAT  | GGAAGGCCATGCCAGTGA       |

## Supplementary Table 2

Antibodies used in this study

| Antibodies                                  | Source                    | Identifier      |
|---------------------------------------------|---------------------------|-----------------|
| Rabbit Anti-METTL3 antibody                 | Abcam                     | Cat# 195,352    |
| Rabbit Anti-TRAF6 antibody                  | Abcam                     | Cat# 33915      |
| Rabbit Anti-GAPDH antibody                  | Abcam                     | Cat# 9484       |
| Rabbit Anti-p65 antibody                    | Cell Signaling Technology | Cat# 4764       |
| Rabbit Anti-p-p65 antibody                  | Cell Signaling Technology | Cat# 3033       |
| Rabbit Anti-I $\kappa$ B antibody           | Proteintech               | Cat# 10268-1-AP |
| Rabbit Anti-p-I $\kappa$ B antibody         | Cell Signaling Technology | Cat# 2859S      |
| Goat Anti-Rabbit IgG H&L (HRP)              | Abcam                     | Cat# 205718     |
| Goat Anti-Rabbit IgG H&L (Alexa Fluor® 488) | Abcam                     | Cat# 150,077    |
| Goat Anti-Rabbit IgG H&L (Alexa Fluor® 594) | Abcam                     | Cat# 150,080    |
